# Supplementary material for: Cytotoxic Escherichia coli strains encoding colibactin isolated from immunocompromised mice with urosepsis and meningitis
Source: PubMed Central journal article supplement (PMC5858775; doi:10.1371/journal.pone.0194443), 2018-03-19
Supplement: pone.0194443.s001.pdf [file pone.0194443.s001.pdf]

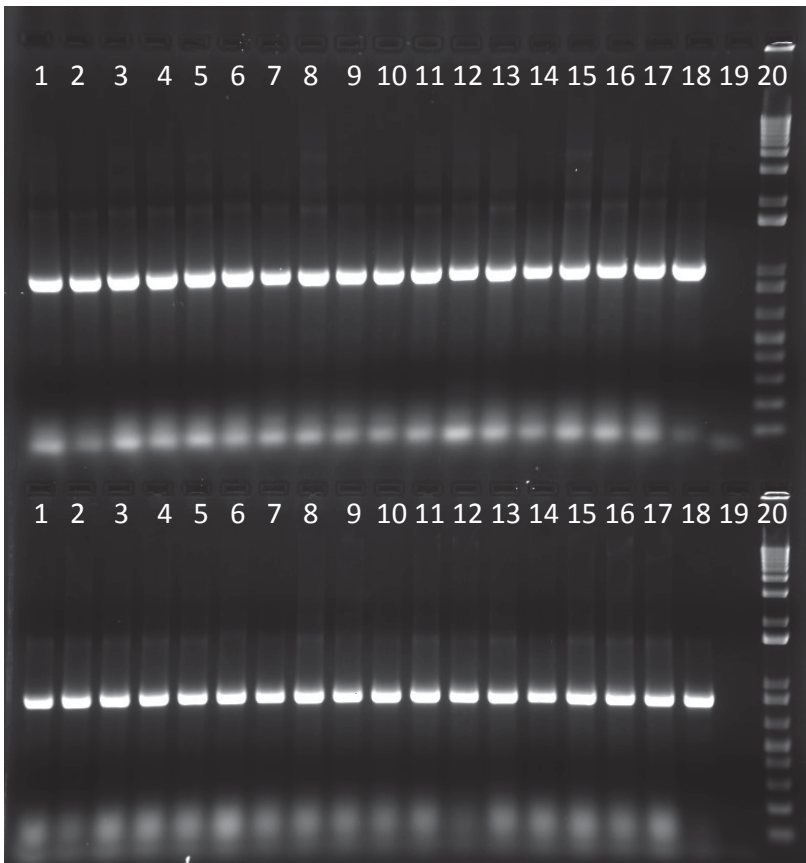

**S1 Fig. Amplification of *clbA* and *clbQ* in DNA from 17 mouse *E.coli* isolates.** Top row: *clbA* gene, bottom row: *clbQ* gene. Lane 1 to lane 17, 17 *E.coli* isolates from mice fecal samples; line 18, NC101 (positive control); line 19, no DNA control; line 20, 1 Kb plus molecular marker.
