# Supplementary material for: Cytotoxic Escherichia coli strains encoding colibactin isolated from immunocompromised mice with urosepsis and meningitis
Source: PubMed Central journal article supplement (PMC5858775; doi:10.1371/journal.pone.0194443), 2018-03-19
Supplement: pone.0194443.s002.pdf [file pone.0194443.s002.pdf]

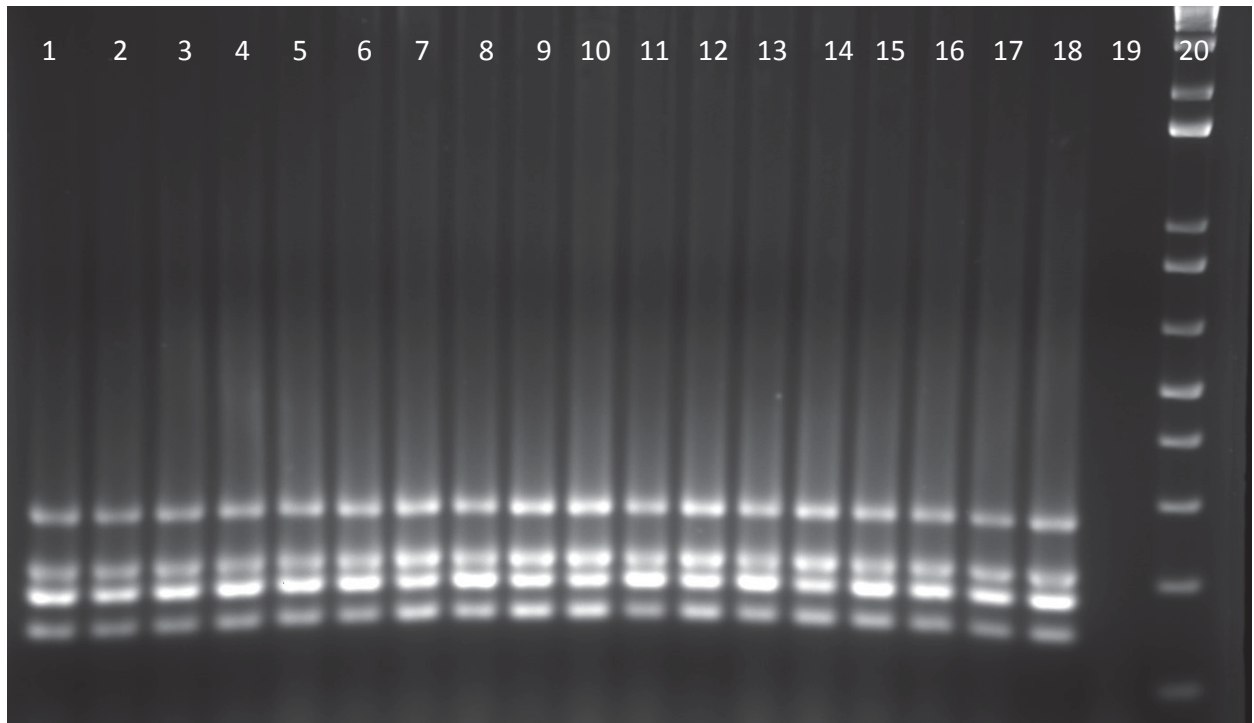

**S2 Fig. Phylogenetic group determination of *E.coli*.** Lane 1 to lane 17, 17 *E.coli* isolates from mice fecal samples; line 18, NC101 (B2 group positive control); line 19, no DNA control; line 20, 1 Kb plus molecular marker.
